1 **Ecological specificity of the metagenome in a set of lower termite**  
2 **species supports contribution of the microbiome to adaptation of the**  
3 **host**

4  
5 Lena Waidele, Judith Korb, Christian R Voolstra, Franck Dedeine, and Fabian Staubach

6  
7 **Author affiliations**

8 For L. Waidele, J. Korb, and F. Staubach see corresponding author address

9  
10 Christian R Voolstra  
11 Department of Biology, University of Konstanz, 78457 Konstanz, Germany  
12 christian.voolstra@uni-konstanz.de

13  
14 Franck Dedeine  
15 Institut de Recherche sur la Biologie de l’Insecte, UMR 7261, CNRS - Université de Tours,  
16 France  
17 franck.dedeine@univ-tours.fr

18  
19 **Corresponding author**

20 Dr. Fabian Staubach  
21 Biologie I  
22 Universitaet Freiburg  
23 Hauptstr. 1  
24 79104 Freiburg  
25 Germany  
26 phone: +49-761-203-2911  
27 fax: +49-761-203-2644  
28 email: fabian.staubach@biologie.uni-freiburg.de

29  
30 **Running title**

31 lower termite metagenomes

32  
33  
34  
35  
36  
37  
38  
39  
40  
41  
42  
43  
44  
45  
46  
47  
48  
49  
50

51 **Abstract**

52 **Background**

53 Elucidating the interplay between hosts and their microbiomes in ecological adaptation has  
54 become a central theme in evolutionary biology. A textbook example of microbiome-  
55 mediated adaptation is the adaptation of lower termites to a wood-based diet, as they  
56 depend on their gut microbiome to digest wood. Lower termites have further adapted to  
57 different life types. Termites of the wood-dwelling life type never leave their nests and feed  
58 on a uniform diet. Termites of the foraging life type forage for food outside the nest and  
59 have access to other nutrients. Here we sought to investigate whether the microbiome that  
60 is involved in food substrate breakdown and nutrient acquisition might contribute to  
61 adaptation to these ecological differences. We reasoned that this should leave ecological  
62 imprints on the microbiome.

63

64 **Results**

65 We investigated the protist and bacterial microbiomes of a total of 29 replicate colonies  
66 from five termite species, covering both life types, using metagenomic shotgun  
67 sequencing. The microbiome of wood-dwelling species with a uniform wood diet was  
68 enriched for genes involved in lignocellulose degradation. Furthermore, metagenomic  
69 patterns suggest that the microbiome of wood-dwelling species relied primarily on direct  
70 fixation of atmospheric nitrogen, while the microbiome of foraging species entailed the  
71 necessary pathways to utilize nitrogen in the form of nitrate for example from soil.

72

73 **Conclusion**

74 Our findings are consistent with the notion that the microbiome of wood-dwelling species  
75 bears an imprint of its specialization on degrading a uniform wood diet, while the  
76 microbiome of the foraging species might reflect its adaption to access growth limiting

77 nutrients from more diverse sources. This supports the idea that specific subsets of  
78 functions encoded by the microbiome can contribute to host adaptation.

79

## 80 **Keywords**

81 lower termites, metagenomics, ecology, adaptation

82

## 83 **Background**

84 The importance of microbes for the evolution of higher organisms is starting to be realized  
85 [1, 2]. Metazoan evolution is not only driven by pathogenic microbes, as reflected by fast  
86 evolution of immune genes [3]. Rather, microbes often are facilitators of metabolic and  
87 environmental adaptations [2, 4, 5]. For instance, the gut microbial communities of wood-  
88 feeding roaches and termites facilitate thriving on a wood diet that is difficult to digest and  
89 poor in nitrogen. Nitrogen fixation and the digestion of wood depend on the termite gut  
90 microbiome [2, 6, 7]. In lower termites, lignocellulose degradation was initially mainly  
91 attributed to unicellular eukaryotes (protists) in the gut [8]. Recently, it has become evident  
92 that lignocellulose degradation is a synergistic effort of the termite, its associated protists,  
93 and bacteria [9–11]. In addition to their role in lignocellulose degradation, bacteria are also  
94 essential for the assimilation of nitrogen taken up from the environment. Nitrogen can be  
95 acquired from the environment either via fixation from the atmosphere [12, 13], or via  
96 nitrate reduction [14]. Also, nitrogen can be recycled from the metabolic waste product uric  
97 acid [15, 16]. By using genome sequencing and pathway reconstruction, these processes  
98 have been assigned to four major bacterial phyla in the termite gut: Proteobacteria  
99 (*Desulfovibrio* [17]), Spirochetes (*Treponema* [18, 19]), Bacteroidetes (*Azobacteroides*)  
100 [16], and Elusimicrobia (*Endomicrobium* [20, 21]).

101 Many bacteria in the termite gut live in tight association with protists, where they sit  
102 on the surface [22, 23], in invaginations of the cell membrane [17], or even inside the  
103 protist cells [24]. Such tight associations lead to frequent vertical transmission of bacteria

104 between protist generations. In return, protists and bacteria are vertically transmitted  
105 between termite generations via proctodeal trophallaxis during colony foundation [25].  
106 Vertical transmission has led to co-speciation between bacteria and their protist hosts, and  
107 sometimes even the termite hosts [26–29]. Evidence for horizontal transfer of protists  
108 between termite species, so called transfaunations, is limited to a few exceptions [30].  
109 Hence, the termite host species association is rather strict, leading to strong phylogenetic  
110 imprints on protist community structure [31–33]. In comparison, the bacterial microbiome is  
111 more flexible, frequently transferred between termite host species [34], and affected by  
112 diet [33, 35–41].

113         There is evidence that the gut microbiome of termites has contributed to the  
114 adaptation of different termite species to their specific ecologies [33, 36, 42–44]. There are  
115 pronounced ecological differences between the so-called termite life types [45, 46]. Termite  
116 species of the wood-dwelling life type never leave their nest except for the mating flight.  
117 They feed on a relatively uniform bonanza resource, that is the piece of wood they built  
118 their nest in [47, 48]. On the other hand, foraging species leave their nest to forage for  
119 food and have access to additional nutrients [47, 49]. This likely imposes different selection  
120 pressures on the termite holobiont, in particular with regard to nutrient uptake. Because  
121 the microbiome is directly involved in nutrient uptake, it seems reasonable to hypothesize  
122 that it may also play a role in adaptation to life type related ecological differences. In this  
123 scenario, one would expect the life types to leave an imprint on microbiome structure and  
124 function. As such, searching for microbial imprints of a given life type can possibly provide  
125 us with a lead for microbiome-mediated adaptation.

126         One potential pitfall of such an endeavor is that microbiomes may bear imprints  
127 from transient microbes that were ingested from the environment. Transient microbes  
128 rarely form evolutionary relevant relationships with the host [50, 51]. Instead, they reflect  
129 short-term associations with microbes from the local environment the termites were

130 collected from. When the local environment correlates with other ecological differences,  
131 these imprints could be falsely interpreted as potentially adaptive changes of the  
132 microbiome. Therefore, it is essential to reduce the impact of these microbes on the  
133 analysis. In order to explore potential ecological imprints on the microbiome, we focused  
134 on an evolutionary switch between wood-dwelling and foraging life types in the  
135 Rhinotermitidae (Figure 1). *Reticulitermes* species are of the foraging life type, while  
136 *Prorethitermes simplex* is wood-dwelling. If the microbiome was affected by life type  
137 specific ecology, we would expect that the microbiome of *Prorethitermes simplex* was  
138 similar to that of the other wood-dwelling species (*Cryptotermes*) although these are from  
139 a different family (Kalotermitidae). At the same time, the microbiome of the foraging  
140 *Reticulitermes* species should bear distinct features. Alternatively, if there was no  
141 ecological imprint, we would expect the microbiome to follow a phylogenetic pattern, with  
142 the Rhinotermitidae *Prorethitermes* and *Reticulitermes* forming a cluster and the  
143 *Cryptotermes* species (Kalotermitidae) forming a second cluster. Using this experimental  
144 setup, we recently showed that protist community composition aligned with phylogeny, but  
145 bacterial communities aligned more strongly with wood-dwelling and foraging life types  
146 [33].

147 To further explore this, we investigated whether changes in microbiome composition  
148 are also reflected by changes in microbiome function, as would be expected if the  
149 microbiome played a role in adaptation. For instance, we would expect dietary adaptations  
150 to be reflected by changes to pathways involved in substrate breakdown and effective  
151 provisioning of limiting nutrients such as nitrogen. In order to test whether and which  
152 changes in the functional repertoire align with life type and could be involved in potential  
153 adaptation to different ecologies, we characterized the metagenome of two foraging  
154 species; *Reticulitermes flavipes* and *Reticulitermes grassei*. We compared their functional  
155 repertoire to that of three wood-dwelling species *Prorethitermes simplex*, *Cryptotermes*

156 *secundus*, and *Cryptotermes domesticus*. Because there can be substantial variation in  
157 microbial communities between colonies [52–55], we analyzed five *C. domesticus*, eight  
158 *C. secundus*, seven *P. simplex*, five *R. flavipes*, and four *R. grassei* replicate colonies. We  
159 focused on the persistent, long-term differences between microbiomes by controlling short-  
160 term effects caused by the influx of transient microbes. This was achieved by feeding a  
161 common diet of sterile *Pinus* wood for several weeks prior to sample collection.

162

## 163 **Results**

164 We analyzed a total of ~440 million metagenomic shotgun sequences. Between 974,176  
165 and 8,949,734 sequences per sample were of microbial origin (Table S1). Sequences were  
166 subsampled (rarefied) to 1,386,882 bacterial and 2,781 protist annotated sequences per  
167 sample. For annotation, sequences were aligned to a reference database of clusters of  
168 orthologous groups of genes (COGs) with known function. These COGs represent the  
169 lowest level of the eggNOG hierarchical annotation. At the next higher level, the COGs are  
170 grouped into pathways (Figure S1, Figure S9), and at the third and highest level, the  
171 pathways are grouped into three categories; “information storage and processing”, “cellular  
172 process and signaling”, and “metabolism”. We adhere to this definition of the eggNOG  
173 hierarchical terms throughout the study.

174

175 “information storage and processing” differentiates the protist metagenomes of wood-  
176 dwelling and foraging lower termite species

177 In our previous study [33] on the identical samples, the protist communities of the  
178 Rhinotermitidae *Prorhinotermes* and *Reticulitermes* clustered together, supporting a  
179 phylogenetic imprint on community composition. Here, we tested whether this pattern was  
180 also reflected by the functions encoded by the protist metagenome. Therefore, we  
181 annotated metagenome encoded functions in the shot gun sequences and compared the

182 functional metagenome profiles across host species, using Bray-Curtis-Dissimilarity [56].  
183 This index considers abundance of functional categories, thus avoiding arbitrary coverage  
184 cutoffs.

185 The protist functional repertoire clustered according to host family and genus  
186 (Figure 2A), thus showing a dominant phylogenetic imprint. Family wise clustering was  
187 supported by Redundancy Analysis (RDA): the model including host family explained more  
188 variance in the functional repertoire and produced lower AICs than the model based on life  
189 type (Table 1). For a more detailed view, we analyzed the three categories at the highest  
190 level in the eggNOG hierarchical annotation (Figure S1) separately. Cluster analysis of the  
191 categories “cellular process and signaling” and “metabolism” supported the notion that  
192 phylogenetic relatedness is an important factor for functional similarity (Supplement  
193 Figures S4B and D). In contrast, the portion of the metagenome assigned to “information  
194 storage and processing” (Figure 2B) clustered primarily by life type. The stronger effect of  
195 life type than phylogeny on this functional category was also supported by higher  
196 explanatory power and lower AICs in RDA (Table 1).

197 Identification of the functions that differentiate the protist metagenomes of the  
198 wood-dwelling and foraging species can hold clues with regard to the nature of potentially  
199 adaptive phenotypes in the protist metagenome. In order to do so, we performed a linear  
200 discriminant analysis (LEfSe: [57]). This analysis identified 22 over-represented COGs in  
201 foraging and 14 in wood-dwelling species (Figure 3A, Table S3,  $p < 0.05$ ,  $q < 0.05$ , LDA  
202 score  $> 2$ , Figure S6).

203 The pathway “replication, recombination, and repair” was over-represented in the  
204 foraging species (Figure 3A, Table S3,  $p = 0.0001$ ,  $q = 0.002$ ). The over-represented  
205 COGs in this pathway included a DNA dependent DNA-polymerase (COG0470) and five  
206 helicases (COG0514, COG0553, COG1199, COG1204, ENOG410XNUT, see Figure 3B  
207 for grouped analysis and Table S3 for individual COG p- and q-values). In wood-dwelling

208 species, the pathway “transcription” was over-represented ( $p = 0.0004$ ,  $q = 0.003$ ). The  
209 over-represented COGs in this pathway contained DNA binding domains and were  
210 supposedly involved in transcriptional regulation (COG5147, ENOG4111SAB).

211

### 212 The bacterial metabolic metagenome aligns with host ecology

213 In our previous study [33], the bacterial community composition of termite hosts clustered  
214 primarily by life type, which is consistent with ecology related differences between  
215 microbiomes. Following the rationale above, we tested whether this pattern was also  
216 reflected by the functions encoded by the metagenome.

217         Against the expectation from our previous study, the functional bacterial profiles  
218 showed no life type, but a phylogenetic imprint, which is in line with the protist functional  
219 profiles. Most samples clustered according to host family (Figure 2C). Analyzing the three  
220 high-level eggNOG functional categories separately provided more detailed insight. The  
221 categories “cellular process and signaling” and “information storage and processing”  
222 supported the notion of strong phylogenetic effects on metagenome function (Supplement  
223 Figures S5B and C). In contrast, the metabolic metagenomes (Figure 2D) clustered  
224 primarily according to host life type. Host life type was also a better predictor for metabolic  
225 functions than host family in RDA (Table 1).

226         Aside from these general patterns, several samples stood out. Samples Rg2 and  
227 Rg4 of *R. grassei* were on long branches in the dendrograms (Figure 2 and Supplement  
228 Figure S5), suggesting unusual functional profiles. Notably, these samples already stood  
229 out in our previous study [33] because of their unusual abundance of microbial taxa  
230 potentially due to infection with pathogens. This unusual composition was confirmed by  
231 taxonomic annotation in this study (see Supplement Figure S3). Sample Cs7 (*C.*  
232 *secundus*) also clustered separately from the other samples. This was mainly driven by  
233 abundant transposases in this sample (53.1% of sequences) (for example COG1662,



234 COG3385, or ENOG410XT1T, see Table S2), accompanied by an increase in the  
235 frequency of *Bacteroides* (Figure S3) that are rich in conjugative transposons [58, 59]. We  
236 performed all analyses with and without these samples and found no qualitative  
237 differences (data not shown).

238 Bacterial metabolic functions that differentiated wood-dwelling from foraging  
239 species were identified using linear discriminant analysis (LEfSe). 105 metabolic COGs  
240 were over-represented in the wood-dwelling species, while 151 were over-represented in  
241 the foraging species (Table S4,  $p < 0.05$ ,  $q < 0.05$ , LDA score  $> 2$ , Figure S7). All COGs  
242 described as over-represented or enriched in the following were subject to these p-value,  
243 q-value and LDA cutoffs. Because of their specialized diet, genes involved in nitrogen  
244 metabolism and lignocellulose break down like glycoside hydrolases (GH) are of particular  
245 interest, when focusing on metabolic differences among gut microbiomes in wood-feeding  
246 termites with different ecologies. In fact, among the genes involved in 'carbohydrate  
247 transport and metabolism' that were enriched in the microbiome of wood-dwelling termites,  
248 GHs were over-represented (43.3% of enriched genes versus 12% expected, exact  
249 binomial test:  $p = 2.124e-05$ , Table S4, S5). In the foraging termite species, only one gene  
250 with putative lignocellulolytic activity was over-represented (COG3858), suggesting that  
251 the wood-dwelling species have a higher potential for complex carbohydrate degradation.  
252 To further investigate differences in GH abundance between the microbiomes of wood-  
253 dwelling and foraging species, we performed a detailed pathway analysis using the CAZy  
254 database ([60], Figure 4). All GHs acting in hemicellulose break-down were more abundant  
255 in the wood-dwelling species (Figure 4B). Among the cellulolytic enzymes,  $\beta$ -glucosidases  
256 were significantly more abundant in the wood-dwelling species. The other two enzymes  
257 involved (cellulase (endo- $\beta$ -1.4-glucanase), cellobiohydrolase) showed a trend into the  
258 same direction. All of the genes with cellulolytic or hemicellulolytic activity were affiliated  
259 with Bacteroidetes (mostly members of the genus *Bacteroides*) or the genus *Treponema*.

260 Additional support for the increased importance of hemicellulose utilization in the wood-  
261 dwelling species, was provided by the over-representation of twelve COGs annotated as  
262 TonB-dependent receptors (ENOG410XNNV, ENOG410XNPQ or COG4206, see Table  
263 S4). Apart from other substrates, these receptors are important for the uptake of plant-  
264 derived hemicellulose [61, 62]. All functions annotated as TonB-dependent receptors (or  
265 TonB-dependent associated receptor plugs) were affiliated with the genus *Bacteroides*  
266 (see Table S4).

267 Because wood is poor in nitrogen, termites depend on an efficient system for  
268 conserving and upgrading nitrogen [6]. In the wood-dwelling species, a potential  
269 nitrogenase ((*nifH*) COG1348) was over-represented (Figure 4C, Table S4). Nitrogenases  
270 are key enzymes in the fixation of atmospheric nitrogen and downstream ammonia  
271 synthesis. Nitrogenase activity was mainly affiliated with members of the genus  
272 *Treponema* (Figure 4C). In contrast, in the foraging species, COGs involved in  
273 dissimilatory nitrate reduction (COG1251, COG5013, COG2181, COG0243, Figure 4C,  
274 Table S4) were over-represented. They were affiliated with a variety of different genera  
275 ranging from *Desulfovibrio* and *Gordonibacter* to *Stenoxybacter*, *Enterobacter* and  
276 *Serratia*. *Serratia* and *Enterobacter* are potential insect pathogens and contributed to the  
277 prevalence of one of the three nitrate reductases, narG (COG5013). Closer inspection of  
278 the source of these bacteria revealed that they mainly stemmed from the abnormal  
279 samples Rg2 and Rg4 that we suspected to carry a potential pathogenic infection. When  
280 we remove these samples from the analysis the increase of narG in foragers remains  
281 significant ( $p = 0.034$ ).

282 For living on a nitrogen poor substrate, it can also be adaptive to effectively recycle  
283 nitrogen from the main waste product of the host's amino acid metabolism, uric acid. Uric  
284 acid can be recycled through anaerobic ammonia production and downstream glutamate  
285 synthesis [6, 15, 20, 63]. In the wood-dwelling species a putative glutamate

286 dehydrogenase (COG0334), involved in glutamate synthesis by ammonia assimilation,  
287 was over-represented. This glutamate dehydrogenase gene was mainly affiliated with  
288 members of the genera *Bacteroides*, *Treponema* and *Desulfovibrio*. In the foraging  
289 species, COGs with putative glutamine (COG0174) and glutamate synthase (COG0067,  
290 COG0069) function, were enriched (Figure 4D). These COGs were affiliated with  
291 *Desulfovibrio*, *Treponema*, *Pseudomonas* and *Acetobacterium*.

292

## 293 **Discussion**

294 In this study, we assessed functional differences of termite metagenomes that underwent  
295 an evolutionary switch from wood-dwelling to foraging to identify putative contributions of  
296 the microbiome to ecological niche adaptation. To do this, we chose a set of five termite  
297 species (two foraging, three wood-dwelling species) and determined whether the  
298 functional profiles of the termite gut microbiome followed phylogeny of the host or aligned  
299 with host ecology. We hypothesized that alignment of microbiome function with termite life  
300 type is consistent with a contribution of the microbiome to termite holobiont adaptation to  
301 different ecologies. By comparing the functional content of microbiomes of different host  
302 species we focused on long-term evolutionary processes.

303 A potential pitfall of such an approach is that an alignment of the termite microbiome  
304 with life type-related ecology could also be caused by short-term differences between  
305 microbiomes that are merely transient. For example, microbes in the environment might  
306 differ between collection sites for the different host species. Further, ingestion of  
307 environmental microbes might lead to an association between microbiome and ecology.  
308 Similarly, differences in local food supply can lead to transient, short-term effects on the  
309 termite microbiome [55]. Consequently, such short-term differences reflect environmental  
310 differences at termite collection sites, rather than potentially adaptive, evolved differences  
311 between host-species-specific microbiomes.

312 For this reason, we chose to follow an approach where we control for environmental  
313 and dietary differences by acclimating all termites on the same (sterile) food source and to  
314 identical environmental conditions. We consider metagenomic patterns that persist under  
315 such highly controlled experimental conditions as robust and indicative of long-term,  
316 evolutionary acquired differences, rather than short-term imprints originating from  
317 differences in the environment or food source. It should be noted that the experimental  
318 setup poses a restriction to the number of sampled host species [33].

319  
320 Increased potential for replication in the protists of foraging termite species

321 In the protist metagenome of foraging species, genes involved in replication were more  
322 abundant. High replication rates are expected to be more frequently under positive  
323 selection during recolonization of the gut with protists, when the gut environment has not  
324 yet reached carrying capacity [64]. Therefore, we would like to speculate that this  
325 difference is related to the fact that *Reticulitermes* guts have to be recolonized more  
326 frequently because they molt more frequently; the intermolt periods in *Reticulitermes* are  
327 about two weeks long [49], while they average almost two months in *Cryptotermes* [48].  
328 During molting the protists are lost and the guts have to be recolonized through proctodeal  
329 trophallaxis from nest mates [65]. However, we are aware that differences in the relative  
330 abundance of housekeeping genes like those required for replication between protist  
331 microbiomes can not be clearly disentangled from differences in average protist genome  
332 size and therefore should be interpreted with caution.

333  
334 Enrichment of genes for lignocellulose degradation in the microbiome of wood-dwelling  
335 termite species

336 While genes involved in replication differentiated the protist metagenomes of wood-  
337 dwelling and foraging species in our study, metabolic genes differentiated the bacterial

338 metagenomes. Consistent with differences in their respective diets, the metagenomes of  
339 foraging and wood-dwelling species in our study differed by their potential for cellulose and  
340 hemicellulose utilization. Several GHs that have cellulolytic and hemicellulolytic function  
341 were over-represented in the metagenomes of wood-dwelling species (GH families 2, 3,  
342 16, 43, mannosidases, xylosidases, glucanases, xylanases, Figure 4B, Table S4). A more  
343 detailed pathway analysis confirmed that hemicellulases are more abundant in the wood-  
344 dwelling species. This suggests a more pronounced role for lignocellulose degradation in  
345 the metabolism of the wood-dwelling species in our study. Accordingly, TonB dependent  
346 transporters were enriched in the microbiome of wood-dwellers. These transporters can  
347 shuttle hemicellulose and its building-blocks, in particular xylans and xylose through  
348 bacterial membranes [66, 67]. A large fraction of cellulases, hemicellulases, and putative  
349 TonB transporters were attributed to the genus *Bacteroides*. In *Bacteroides*, TonB  
350 dependent transporters are often co-localized and co-regulated with enzymes for  
351 polysaccharide degradation like hemicellulases [59, 68]. This suggests a partnership of  
352 enzymes and transporters in polysaccharide degradation. *Bacteroides* species from the  
353 human gut are also hemicellulose degraders [69], suggesting a distinctive role for the  
354 genus in hemicellulose degradation in termites as well.

355           The above-identified differences in functional potential between the wood-  
356 dwelling and foraging species in our study are suggestive of adaptations to utilize diets  
357 that differ in hemicellulose content. Hemicellulose content differs between wood species  
358 [70, 71]. The wood-dwelling *Cryptotermes* species in our study are mostly found in  
359 hardwood mangroves [72] where they can thrive on a bonanza food resource. The other  
360 wood-dwelling genus in our study, *Prorhinotermes*, lives in similar coastal habitats with a  
361 similar arboreal flora [73]. Hardwood is richer in hemicelluloses and the potential to use  
362 hemicelluloses is larger in the microbiome of species living on hardwood. On the other  
363 hand, *Reticulitermes* species originated in inland habitats [74], prefer soft woods like pine

364 [75, 76] with lower hemicellulose levels, and accordingly, hemicellulolytic pathways are  
365 depleted.

366

367 Termites with different life-types rely on different forms of nitrogen uptake and recycling

368 Nitrogen is scarce in a wood-based diet. As a consequence, termites need to acquire  
369 additional nitrogen from the environment. The microbiome is essential for this process. In  
370 the microbiome of wood-welling species, which feed on a uniform lignocellulose diet, a  
371 potential nitrogenase gene was enriched (nifH, COG1348). Nitrogenases are the key  
372 enzymes in the fixation of atmospheric nitrogen and downstream ammonia synthesis. This  
373 nifH was mainly affiliated with treponemes that have been shown to play an important role  
374 in nitrogen fixation before [12, 18, 19]. In contrast, the microbiome of the foraging species  
375 in our study has a higher potential to provide nitrogen to the termite holobiont by  
376 dissimilatory reduction of nitrate (Figure 4C). Nitrogen in the form of nitrate naturally  
377 occurs in soil. *R. flavipes* has been shown to acquire micro nutrients from soil [77] and to  
378 actively balance mineral uptake by food choice [78]. Therefore, it seems reasonable to  
379 assume that the microbiome of *Reticulitermes* relies on nitrogen from soil in the form of  
380 nitrate to balance the low nitrogen content of wood. The necessary nitrate reductases were  
381 found primarily in *Desulfovibrio*, *Gordonibacter* and *Stenoxybacter* that were found in  
382 association with *Reticulitermes* before and are shared between a wide range of termites  
383 [33, 79, 80].

384       Aside from obtaining nitrogen from the environment (atmosphere, soil), bacteria can  
385 also recycle uric acid nitrogen. All of these processes result in ammonia synthesis, the  
386 central metabolite of nitrogen metabolism. Ammonia is then further assimilated to  
387 glutamate. In the wood-dwelling species a glutamate dehydrogenase (COG0334) was  
388 over-represented. It was mainly affiliated with members of the *Bacteroides*, *Desulfovibrio*  
389 and treponemes. The foraging species seem to rely on another glutamate synthesis

390 pathway, including glutamine (COG0174) and glutamate synthases (COG0067,  
391 COG0069). Accordingly, they were associated with a different set of bacteria including  
392 *Pseudomonas*, *Acetobacterium*, *Desulfovibrio*, and treponemes (Figure 4D).

393

#### 394 Phylogeny and ecology align with metagenome-encoded functions

395 Differences in the propensity for nitrogen uptake and recycling are likely to reflect  
396 differences in diet of the termite host species. Given differences in diet between the  
397 species that represent the different life types, it seems also reasonable to suggest that the  
398 changes in the repertoire of hemicellulases reflects adaptations of the microbiome to diets  
399 with different hemicellulose content. The finding that this manifested specifically in the  
400 metabolic functional repertoire, may suggest that potential selection acts in particular on  
401 metabolic functions.

402 Metabolic microbiome mediated adaptation to different diets can happen in two  
403 ways. First, acquisition of new microbes with adaptive functions could lead to adaptive  
404 changes of the microbiome. Second, genome evolution of microbes that are already  
405 associated with the host could lead to adaptation. Microbes that were already present  
406 before the onset of lineage specific adaptation are likely to be shared among host species.  
407 By contrast, newly acquired microbes are expected to be host lineage specific. We found  
408 that the bacterial groups that contributed most to the differentiation of metabolic functions  
409 are shared among all five host species (*Treponema*, *Bacteroides*, *Desulfovibrio*,  
410 *Dysgomonas*, *Gordonibacter*, *Pseudomonas*, Table S4, Figure S3). This supports that  
411 genome evolution of microbes that were already associated with the host contributed to  
412 potential adaptation in our model system.

413

#### 414 **Conclusion**

415 We applied metagenomic sequencing of gut microbiomes from a controlled experimental  
416 setup to assess a putative contribution of the microbiome to host ecological adaptation that  
417 accompanies the evolutionary switch from wood dwelling to foraging life types. We found  
418 that the overall pattern of microbiome variation reflected a phylogenetic signal.  
419 Interestingly, however, specific functions of the microbiome aligned with the underlying  
420 host ecology. The specific ecology related differences in microbiome function led us to  
421 hypothesize that the microbiome contributed to dietary adaptations, namely different  
422 hemicellulose and nitrogen contents. This hypothesis can now be tested, assessing host  
423 fitness under different dietary conditions. Such experiments will be crucial to disentangle  
424 adaptive functional changes from selectively neutral functional turnover or side effects of  
425 other adaptations.

426

## 427 **Experimental Procedures**

### 428 Termite samples

429 All termites were collected from typical natural habitats (see [33]). They were kept under  
430 constant conditions (27°C, 70% humidity) on autoclaved *Pinus radiata* wood from the  
431 same source for at least six weeks prior to the experiment. The feeding of *Pinus*  
432 represents a natural or near natural treatment; *Pinus* is a natural food source of *P. simplex*  
433 and *Reticulitermes*. *Cryptotermes* growth and behavior on *Pinus* recapitulates that on  
434 natural substrate [72]. The time of the acclimation period was chosen to lie well beyond the  
435 gut passage time of 24 h in lower termites [81, 82] and following Huang et al. [83], who  
436 showed that six weeks are sufficient for the microbiota to adjust to a new diet. That way, all  
437 excretable material like remaining food, transient microbes taken up from the environment  
438 that have no mechanisms to persist in the gut, and microbial DNA taken up before the  
439 experiment was made sure to be excreted. The samples were identical to those analyzed



440 in our previous study, [33] where detailed information about animal collection, keeping, and  
441 cytochrome oxidase II based species identification and a phylogeny can be found.

442

#### 443 DNA extraction and Shotgun sequencing

444 DNA was extracted from a pool of three worker guts per colony using bead beating,  
445 chloroform extraction and isopropanol precipitation (see Supplementary material and  
446 methods file S7). Each of the 29 colony samples went through independent metagenomic  
447 shotgun library preparation and sequencing on an Illumina HiSeq platform (150 bp paired  
448 end reads).

449

#### 450 Analysis

451 We employed a double filtering strategy to remove host DNA from our analysis. First,  
452 sequences were removed that mapped to available host genomes from *C. secundus* [84]  
453 and transcriptomes from *P. simplex* [85] and *R. flavipes*, provided by the 1KITE consortium  
454 ([www.1kite.org](http://www.1kite.org), BioSample SAMN04005235) using BMap [86] (for detailed workflow and  
455 more detailed information about used genomes and transcriptomes see Supplementary  
456 Figure S2 and file S8). Of note, the sequences were not assembled, but individual reads  
457 were directly annotated. In a second step we used taxonomic and functional annotations  
458 with Megan6 [87] to retrieve only sequences that could be unambiguously assigned to  
459 either bacteria or protists. In order to compare the bacterial and protist data sets of all  
460 samples, they were rarefied to the number of sequences in the sample with lowest  
461 coverage, resulting in 1,386,882 and 2,781 sequences per sample, respectively. Sample  
462 Cs4 was excluded from the analysis for insufficient sequence coverage (974,176  
463 sequences), so was Cs5 from the protist data. Sample Ps5 did not pass the analysis  
464 pipeline and was also excluded.

465 Functional annotation with the eggNOG database resulted in the highest number of  
466 annotated sequences (21,215,480 annotated sequences in total) and was chosen for  
467 further functional analysis. Bray-Curtis distances of functional abundances were clustered  
468 with the pvClust package in R [88]. Multivariate modeling was performed via RDA  
469 (Redundancy Analysis) and AICs as well as values for the proportion of variance explained  
470 were derived with the model selection tool ordistep and ordiR2step, as implemented in the  
471 R vegan package [89]. Models were compared to the null-model via ANOVA. To identify  
472 over-represented functions associated with the two termite life types, a Linear Discriminant  
473 Analysis (LDR) was performed using LEfSe [57] and visualized using graphlan [90].  
474 Pathway analysis of CAZy GHs was performed by blasting bacterial reads of all samples  
475 against the full CAZy protein database, using Diamond [91]. GH abundance was estimated  
476 by counting reads with matches on proteins with cellulolytic and hemicellulolytic functions  
477 [92]. Pathway analysis of the nitrogen metabolism was performed by searching COG IDs  
478 corresponding to the KEGG IDs among the over-represented COGs from the LEfSe  
479 analysis. A detailed workflow for full reproducibility can be found in Supplementary Figure  
480 S2 and file S10 and S11.

481

482 **Declarations**

483 Acknowledgments

484 We thank Jan Sobotnik for kindly providing *P. simplex* colonies, as well as Charles Darwin  
485 University (Australia), especially S. Garnett and the Horticulture and Aquaculture team for  
486 providing logistic support to collect *C. secundus*. The Parks and Wildlife Commission,  
487 Northern Territory, Department of the Environment, Water, Heritage and the Arts gave  
488 permission to collect (Permit number 59044) and export (Permit PWS2016-AU-001559)  
489 the termites. This work was funded by DFG grants STA1154/2-1 and KO1895/16-1. We  
490 thank Craig Michell and the KAUST Bioscience Core Lab for sequence library generation  
491 and sequencing. This study was supported by King Abdullah University of Science and  
492 Technology (KAUST) and the High Performance and Cloud Computing Group at the  
493 Zentrum fuer Datenverarbeitung of the University of Tuebingen, the state of Baden-  
494 Wuerttemberg through bwHPC and the German Research Foundation (DFG) through  
495 grant no INST 37/935-1 FUGG. We thank Karen Meusemann and the 1KITE consortium,  
496 in particular the 1KITE Blattodea group, Alexander Donath, Lars Podsiadlowski, Bernhard  
497 Misof, Xin Zhou for granting access of the transcriptome data of *R. santonsensis* syn. *R.*  
498 *flavipes*.

499

500 Ethics approval and consent to participate

501 Not applicable.

502

503 Funding

504 This work was funded by DFG grants STA1154/2-1 and KO1895/16-1 and supported by  
505 the King Abdullah University of Science and Technology (KAUST) and the High  
506 Performance and Cloud Computing Group at the Zentrum fuer Datenverarbeitung of the

507 University of Tuebingen, the state of Baden-Wuerttemberg through bwHPC and the  
508 German Research Foundation (DFG) through grant no INST 37/935-1 FUGG.

509

#### 510 Availability of data and material

511 The raw data has been uploaded to the ncbi short-read archive (BioProject ID  
512 PRJNA509211, Accession: SAMN10573992 – SAMN10574019). Supporting information  
513 and analysis workflows are included in the supplementary files in this article.

514

#### 515 Author contributions

516 FS, JK, LW designed the experiment. JK, FD provided study organisms. LW performed the  
517 experiments, CV generated the sequence data, LW and FS analyzed the data. LW, FS, JK,  
518 CV, and FD wrote the manuscript. All authors read and approved the final manuscript.

519

#### 520 Competing interests

521 The authors declare no competing interests.

522

#### 523 Consent for publication

524 Not applicable.

525

526

527

528

529

530

531

532

533

534 **Figures and Tables**

535

536 **Table 1: Models of the effects of life type and host family (phylogeny) on functional**

537 **community profiles.** Effects were analyzed with Redundancy analysis using the

538 functional abundance table as response variable. Host family was the best explanatory

539 variable for the combination of all protist functions, however life type explained more

540 variance ( $R^2$ ) and produced a lower AIC for the category “information storage and

541 processing” than host family. For all bacterial functions taken together, host family again

542 explained a larger proportion of the variance, while life type was the best explanatory

543 variable in the category “metabolism”.

|                 |                                    | <b>model</b>   | <b>AIC</b> | <b>R<sup>2</sup></b> | <b>p</b> |
|-----------------|------------------------------------|----------------|------------|----------------------|----------|
| <b>protists</b> | all functions                      | null           | -41.8      |                      |          |
|                 |                                    | host family    | -49.0      | 0.27                 | 0.001    |
|                 |                                    | host life type | -45.4      | 0.16                 | 0.001    |
|                 | information storage and processing | null           | -36.8      |                      |          |
|                 |                                    | host life type | -39.0      | 0.11                 | 0.001    |
|                 |                                    | host family    | -38.4      | 0.09                 | 0.001    |
| <b>bacteria</b> | all functions                      | null           | -85.0      |                      |          |
|                 |                                    | host family    | -92.7      | 0.27                 | 0.001    |
|                 |                                    | host life type | -90.1      | 0.20                 | 0.001    |
|                 | metabolism                         | null           | -92.4      |                      |          |
|                 |                                    | host life type | -98.1      | 0.22                 | 0.001    |
|                 |                                    | host family    | -96.8      | 0.18                 | 0.001    |

545

546

547

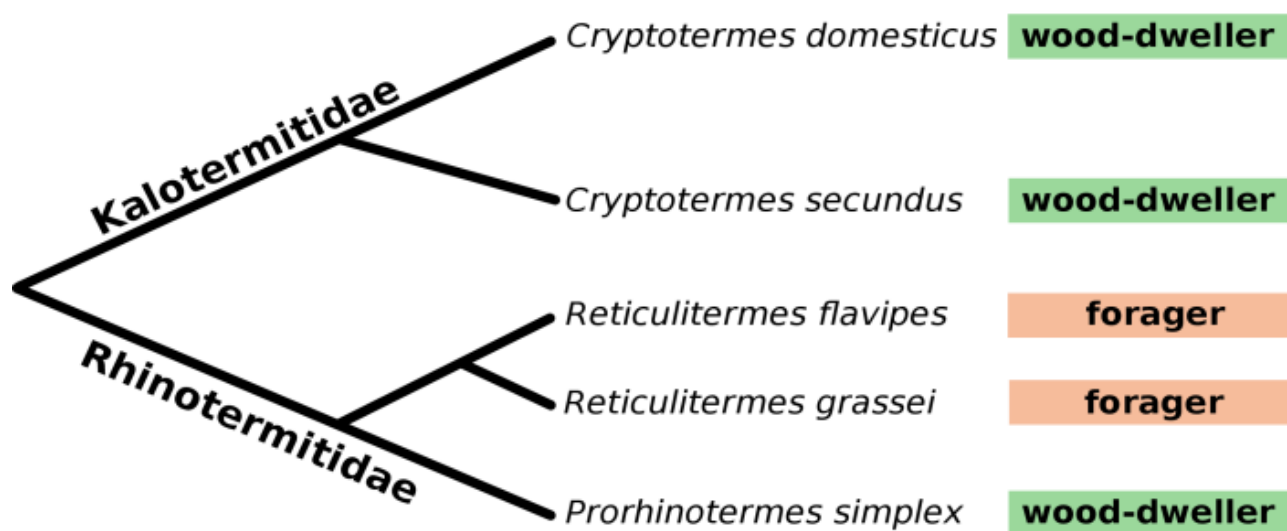

549 **Figure 1: Schematic phylogeny of the five lower termite species used in this study**  
550 **from [33].** Branch length not drawn to scale. Colored boxes indicate the life type.  
551

## Protist functions

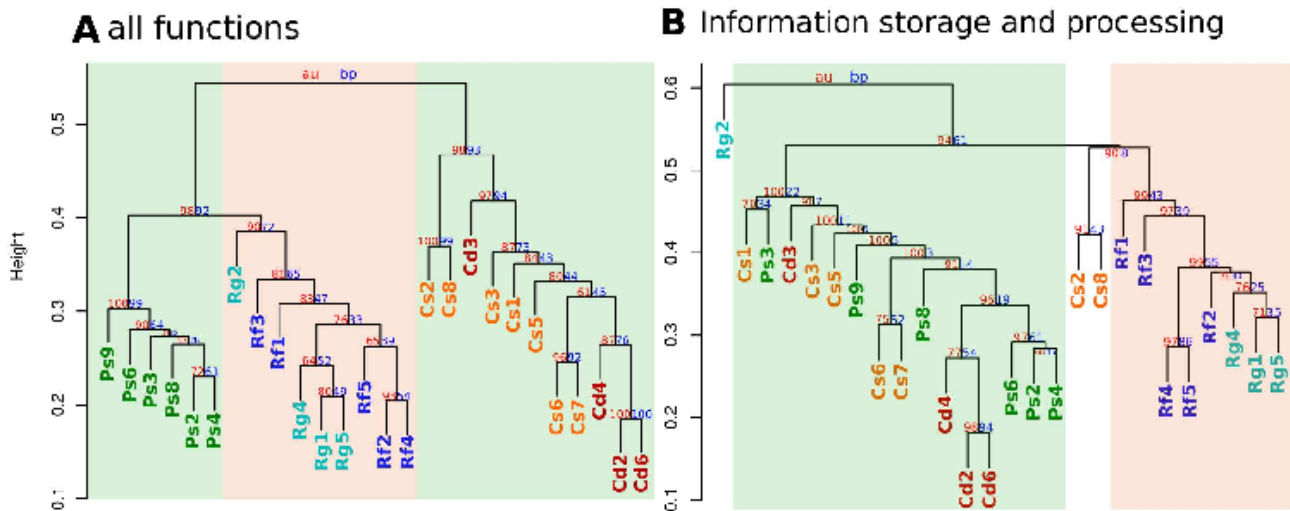

## Bacterial functions

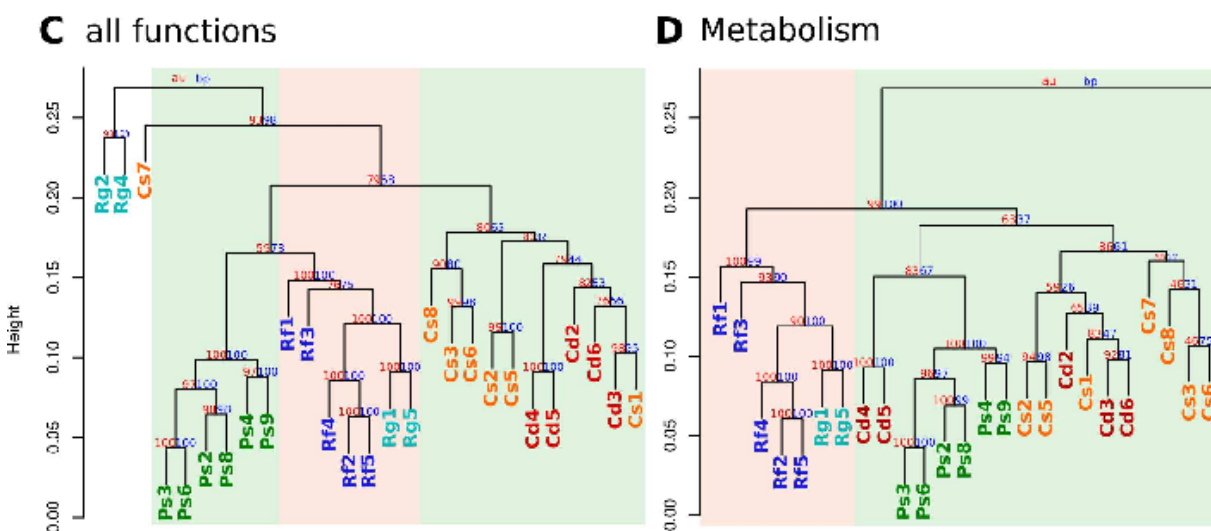

552 **Figure 2: Cluster dendrograms of the functional profiles of the protist and bacterial**  
 553 **community.** Community distances are based on Bray-Curtis Dissimilarities of A) all  
 554 functions of the protist community (25,795 sequences), B) The category “information  
 555 storage and processing” of the protist community (4,527 sequences), C) all functions of the  
 556 bacterial community (21,215,480 sequences), and D) the category “metabolism” of the  
 557 bacterial community (10,586,058 sequences). Cd (red) = *C. domesticus* colonies; Cs  
 558 (orange) = *C. secundus* colonies; Ps (green) = *P. simplex* colonies; Rf (blue) = *R. flavipes*  
 559 colonies; Rg (lightblue) = *R. grassei* colonies. Green background = wood-dwelling life  
 560 types; orange background = foraging life type. For protist functions involved in “information  
 561 storage and processing” in the protist community, samples clustered according to life type.

562 Similarly, the bacterial metabolic metagenomes clustered according to life type. Cluster  
 563 dendrograms of all functional categories of protist and bacterial communities can be found  
 564 in Supplementary Figure S4 and S5.

565

566

**A**

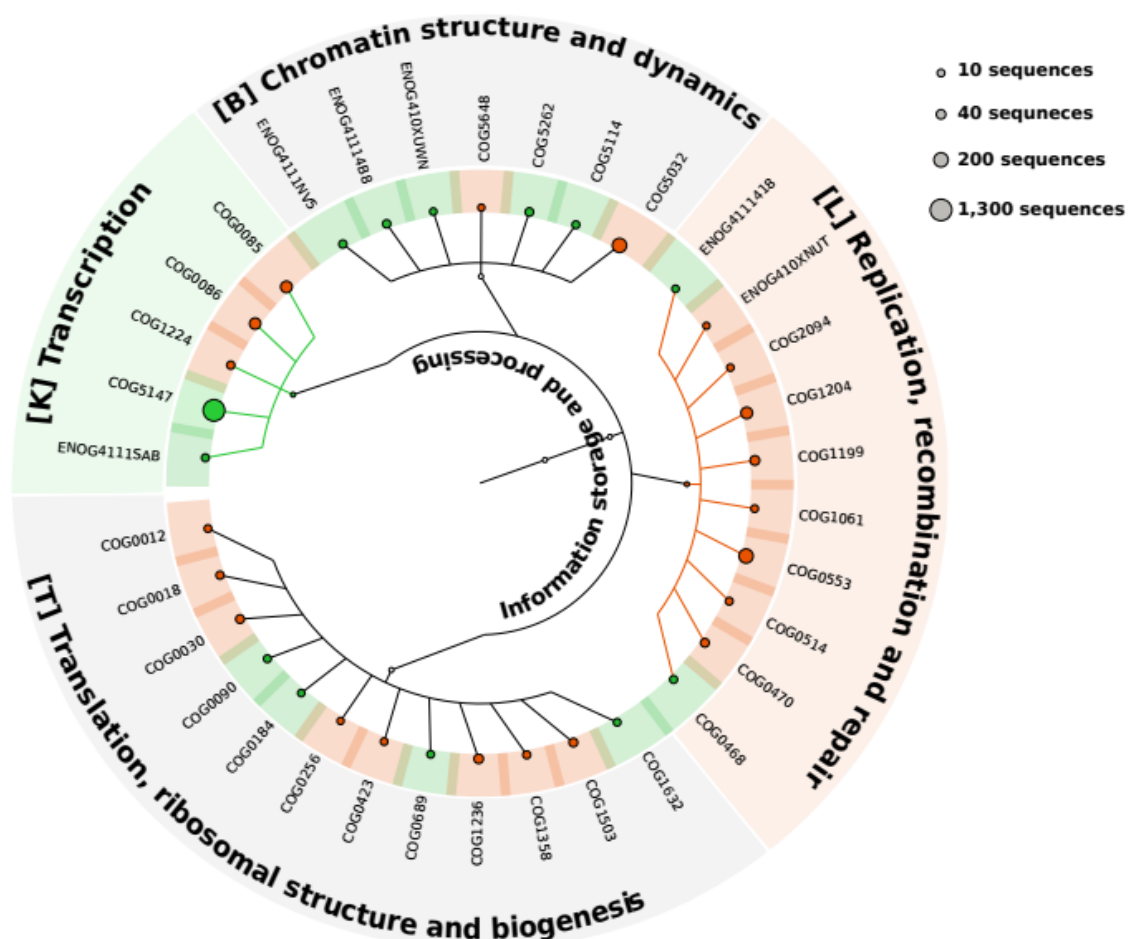

**B**

**[L] Replication, recombination and repair**

**[K] Transcription**

**replication**

**transcriptional regulation**

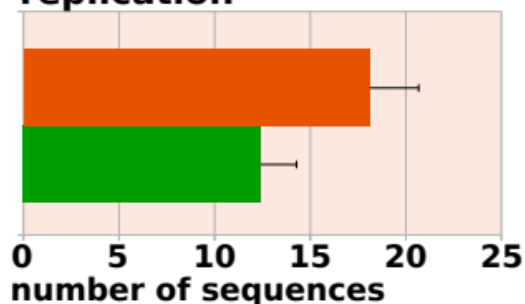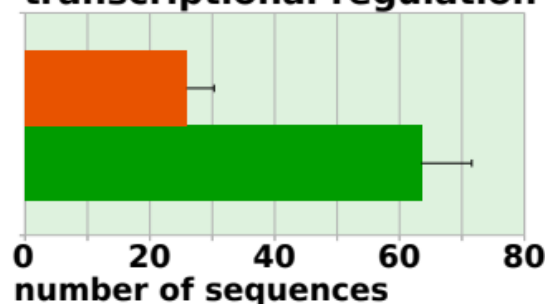



568 **Figure 3: Differences in the functional content of the protist metagenomes of wood-**  
569 **dwelling and foraging species.** A) Circular dendrogram/hierarchy of all over-represented  
570 COGs in the category “information storage and processing” in wood-dwelling species  
571 (green) or foraging species (orange). Circle size at the edges scales with abundance of the  
572 COG. Colored branches indicate over-represented pathways. Over-representation was  
573 detected with LEfSe [57] ( $p < 0.05$ ,  $q < 0.05$ ,  $LDA > 2$ ). A Venn diagram visualizing the total  
574 number, and the differentially abundant number of functions in each of the five pathways  
575 that constitute the category “information storage and processing” can be found in  
576 Supplementary Figure S6. B) Sequence coverage of wood-dwelling (green) and foraging  
577 (orange) species of examples of over-represented COGs mentioned in the text. Error bars  
578 represent 95% confidence intervals across replicate colonies.

579

580

581

582

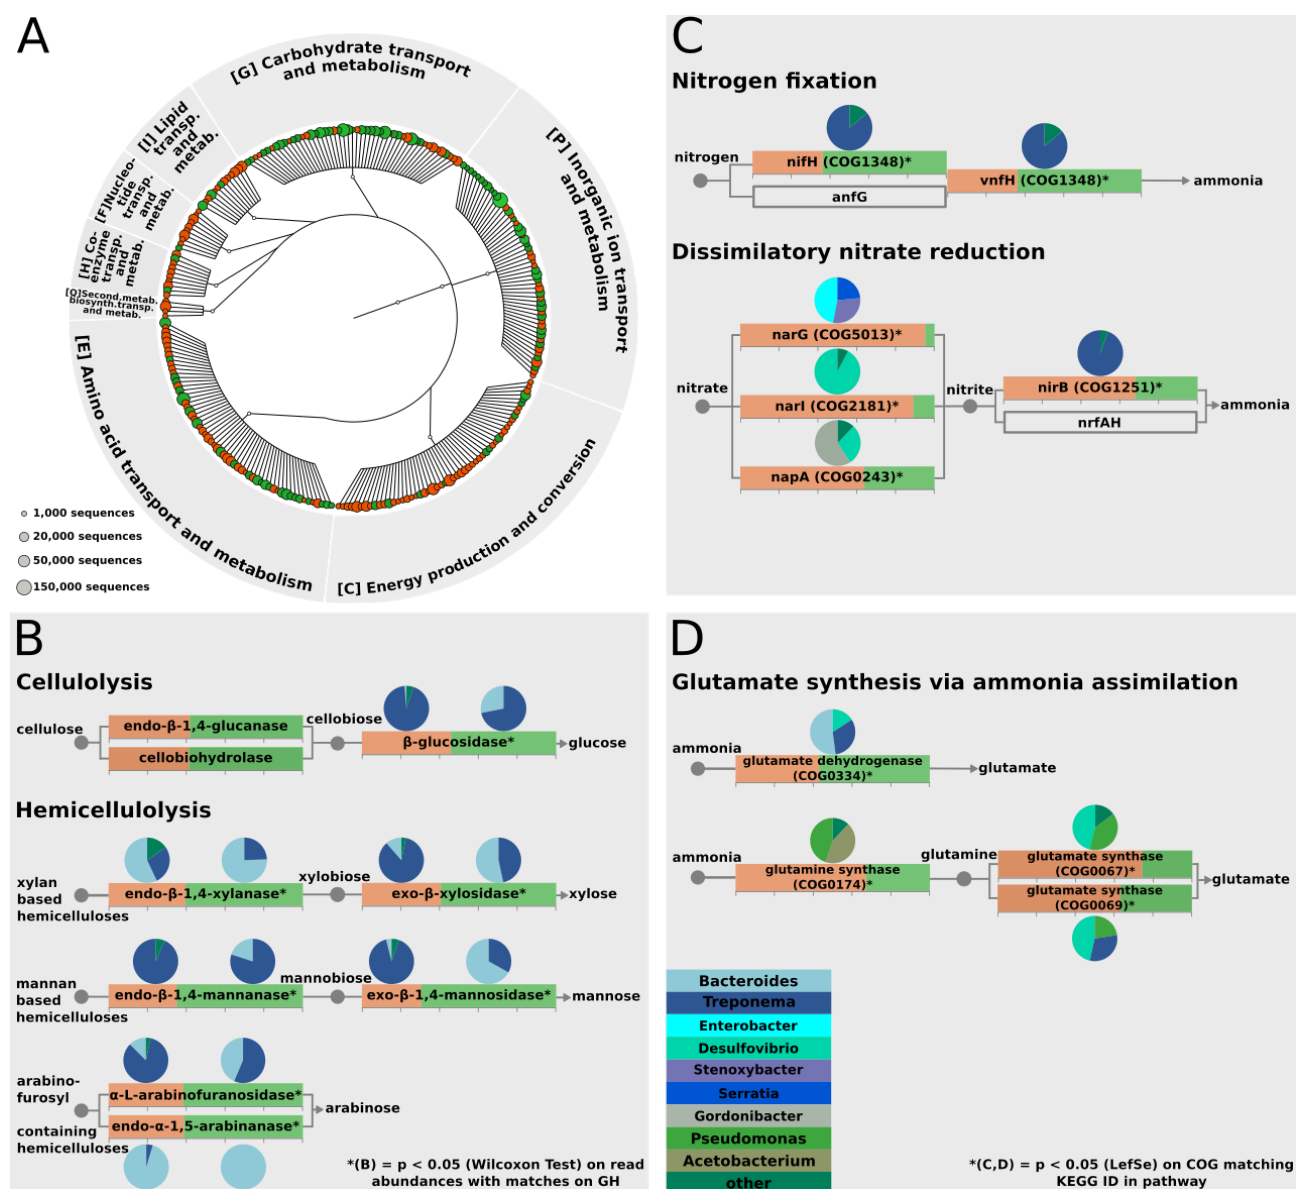

583 **Figure 4: Differences in the functional content of the bacterial metagenomes of**  
 584 **wood-dwelling and foraging species.** A) Circular dendrogram/hierarchy of all COGs in  
 585 the category “metabolism” over-represented in wood-dwelling species (green) or foraging  
 586 species (orange). Circle size at the leafs scales with the abundance of the COG. Over-  
 587 representation was detected with LefSe [57] ( $p < 0.05$ ,  $q < 0.05$ ,  $LDA > 2$ ). A Venn diagram  
 588 visualizing the total number, and the differentially abundant number of functions in each of  
 589 the five pathways that constitute the category “metabolism” can be found in Supplementary  
 590 Figure S7. B) Pathway analysis of cellulose and hemicellulose degradation. Colored boxes  
 591 of cellulolytic or hemicellulolytic genes indicate proportion of relative abundance of  
 592 sequences affiliated with wood-dwelling (green) or foraging (orange) species. C) Pathway

593 analysis of nitrogen metabolism. Boxes for genes with functions in nitrogen metabolism  
594 indicate relative abundance in the two life types. D) Pathway analysis of glutamate  
595 synthesis. Boxes in C) and D) show relative abundance in the two life types of genes with  
596 functions in nitrogen/glutamate metabolism. Pie charts show taxonomic association of the  
597 gene. All hemicellulolytic genes were over-represented in the wood-dwelling species. Also,  
598 a nitrogenase was enriched in the wood-dwelling species, while in the foraging species,  
599 genes involved in dissimilatory nitrate reduction were over-represented.

600

## 601 **Literature**

1. McFall-Ngai M, Hadfield MG, Bosch TCG, Carey HV, Domazet-Lošo T, Douglas AE, et al. Animals in a bacterial world, a new imperative for the life sciences. *PNAS*. 2013;110:3229–36.
2. Bang C, Dagan T, Deines P, Dubilier N, Duschl WJ, Fraune S, et al. Metaorganisms in extreme environments: do microbes play a role in organismal adaptation? *Zoology*. 2018;127:1–19.
3. Drosophila 12 Genomes Consortium, Clark AG, Eisen MB, Smith DR, Bergman CM, Oliver B, et al. Evolution of genes and genomes on the *Drosophila* phylogeny. *Nature*. 2007;450:203.
4. Jaenike J, Unckless R, Cockburn SN, Boelio LM, Perlman SJ. Adaptation via symbiosis: recent spread of a *Drosophila* defensive symbiont. *Science*. 2010;329:212–5.
5. Douglas AE. Multiorganismal insects: diversity and function of resident microorganisms. *Annual review of entomology*. 2015;60:17–34.
6. Brune A. Symbiotic digestion of lignocellulose in termite guts. *Nature Reviews Microbiology*. 2014;12:168–80.

7. Brune A, Dietrich C. The Gut Microbiota of Termites: Digesting the Diversity in the Light of Ecology and Evolution. *Annu Rev Microbiol.* 2015;69:145–66.
8. Cleveland LR. Symbiosis between Termites and Their Intestinal Protozoa. *Proceedings of the National Academy of Sciences of the United States of America.* 1923;9:424–8.
9. Scharf ME, Karl ZJ, Sethi A, Boucias DG. Multiple Levels of Synergistic Collaboration in Termite Lignocellulose Digestion. *PLoS One.* 2011;6. doi:10.1371/journal.pone.0021709.
10. Peterson BF, Stewart HL, Scharf ME. Quantification of symbiotic contributions to lower termite lignocellulose digestion using antimicrobial treatments. *Insect Biochemistry and Molecular Biology.* 2015;59:80–8.
11. Peterson BF, Scharf ME. Metatranscriptome analysis reveals bacterial symbiont contributions to lower termite physiology and potential immune functions. *BMC Genomics.* 2016;17. doi:10.1186/s12864-016-3126-z.
12. Lilburn TG, Kim KS, Ostrom NE, Byzek KR, Leadbetter JR, Breznak JA. Nitrogen Fixation by Symbiotic and Free-Living Spirochetes. *Science.* 2001;292:2495–8.
13. Desai MS, Brune A. Bacteroidales ectosymbionts of gut flagellates shape the nitrogen-fixing community in dry-wood termites. *The ISME Journal.* 2012;6:1302–13.
14. Tiedje J. Ecology of denitrification and dissimilatory nitrate reduction to ammonium. In: *Methods of Soil Analysis. Part 2. Chemical and Microbiological Properties.* 1988. p. 179–244.
15. Potrikus CJ, Breznak JA. Gut bacteria recycle uric acid nitrogen in termites: A strategy for nutrient conservation. *Proc Natl Acad Sci U S A.* 1981;78:4601–5.

16. Hongoh Y, Sharma VK, Prakash T, Noda S, Toh H, Taylor TD, et al. Genome of an endosymbiont coupling N<sub>2</sub> fixation to cellulolysis within protist cells in termite gut. *Science* (New York, NY). 2008;322 November:1108–9.
17. Kuwahara H, Yuki M, Izawa K, Ohkuma M, Hongoh Y. Genome of “*Ca. Desulfovibrio trichonymphae*”, an H<sub>2</sub>-oxidizing bacterium in a tripartite symbiotic system within a protist cell in the termite gut. *The ISME journal*. 2017;11:766–76.
18. Warnecke F, Luginbühl P, Ivanova N, Ghassemian M, Richardson TH, Stege JT, et al. Metagenomic and functional analysis of hindgut microbiota of a wood-feeding higher termite. *Nature*. 2007;450:560–5.
19. Ohkuma M, Noda S, Hattori S, Iida T, Yuki M, Starns D, et al. Acetogenesis from H<sub>2</sub> plus CO<sub>2</sub> and nitrogen fixation by an endosymbiotic spirochete of a termite-gut cellulolytic protist. *Proceedings of the National Academy of Sciences of the United States of America*. 2015;112:10224–30.
20. Hongoh Y, Sharma VK, Prakash T, Noda S, Taylor TD, Kudo T, et al. Complete genome of the uncultured Termite Group 1 bacteria in a single host protist cell. *Proceedings of the National Academy of Sciences of the United States of America*. 2008;105:5555–60.
21. Zheng H, Dietrich C, Radek R, Brune A. *Endomicrobium proavitum*, the first isolate of *Endomicrobia* class. nov. (phylum *Elusimicrobia*) - an ultramicrobacterium with an unusual cell cycle that fixes nitrogen with a Group IV nitrogenase. *Environmental Microbiology*. 2016;18:191–204.
22. Hongoh Y, Sato T, Noda S, Ui S, Kudo T, Ohkuma M. *Candidatus Symbiothrix dinenymphae*: Bristle-like *Bacteroidales* ectosymbionts of termite gut protists. *Environmental Microbiology*. 2007;9:2631–5.

23. Yuki M, Kuwahara H, Shintani M, Izawa K, Sato T, Starns D, et al. Dominant ectosymbiotic bacteria of cellulolytic protists in the termite gut also have the potential to digest lignocellulose. *Environ Microbiol.* 2015;17:4942–53.
24. Brune A. *Endomicrobia*: intracellular symbionts of termite gut flagellates. *Endocytobiosis and Cell Research.* 2012;23:11–5.
25. Shimada K, Lo N, Kitade O, Wakui A, Maekawa K. Cellulolytic Protist Numbers Rise and Fall Dramatically in Termite Queens and Kings during Colony Foundation. *Eukaryot Cell.* 2013;12:545–50.
26. Noda S, Kitade O, Inoue T, Kawai M, Kanuka M, Hiroshima K, et al. Cospeciation in the triplex symbiosis of termite gut protists (*Pseudotriconympha* spp.), their hosts, and their bacterial endosymbionts. *Molecular Ecology.* 2007;16:1257–66.
27. Ohkuma M. Symbioses of flagellates and prokaryotes in the gut of lower termites. *Trends in Microbiology.* 2008;16:345–52.
28. Ikeda-Ohtsubo W, Brune A. Cospeciation of termite gut flagellates and their bacterial endosymbionts: *Trichonympha* species and “*Candidatus Endomicrobium trichonymphae*.” *Molecular Ecology.* 2009;18:332–42.
29. Desai MS, Strassert JFH, Meuser K, Hertel H, Ikeda-Ohtsubo W, Radek R, et al. Strict cospeciation of devescovininid flagellates and *Bacteroidales* ectosymbionts in the gut of dry-wood termites (Kalotermitidae). *Environmental Microbiology.* 2010;12:2120–32.
30. Radek R, Meuser K, Strassert JFH, Arslan O, Teßmer A, Šobotník J, et al. Exclusive Gut Flagellates of Serritermitidae Suggest a Major Transfaunation Event in Lower Termites: Description of *Heliconympha glossotermis* gen. nov. spec. nov. *J Eukaryot Microbiol.* 2018;65:77–92.

31. Yamin MA. Flagellates of the orders Trichomonadida Kirby, Oxymonadida Grassé, and Hypermastigida Grassi & Foà reported from lower termites (Isoptera families Mastotermitidae, Kalotermitidae, Hodotermitidae, Termopsidae, Rhinotermitidae, and Serritermitidae) and from the wood-feeding roach *Cryptocercus* (Dictyoptera: Cryptocercidae). *Sociobiology*. 1979;:5–119.
32. Kitade O. Comparison of Symbiotic Flagellate Faunae between Termites and a Wood-Feeding Cockroach of the Genus *Cryptocercus*. *Microbes Environ*. 2004;19:215–20.
33. Waidele L, Korb J, Voolstra CR, Künzel S, Dedeine F, Staubach F. Differential Ecological Specificity of Protist and Bacterial Microbiomes across a Set of Termite Species. *Front Microbiol*. 2017;8. doi:10.3389/fmicb.2017.02518.
34. Bourguignon T, Lo N, Dietrich C, Šobotník J, Sidek S, Roisin Y, et al. Rampant Host Switching Shaped the Termite Gut Microbiome. *Current biology : CB*. 2018;28:649-654.e2.
35. Boucias DG, Cai Y, Sun Y, Lietze V-U, Sen R, Raychoudhury R, et al. The hindgut lumen prokaryotic microbiota of the termite *Reticulitermes flavipes* and its responses to dietary lignocellulose composition. *Molecular ecology*. 2013;22:1836–53.
36. He S, Ivanova N, Kirton E, Allgaier M, Bergin C, Scheffrahn RH, et al. Comparative Metagenomic and Metatranscriptomic Analysis of Hindgut Paunch Microbiota in Wood- and Dung-Feeding Higher Termites. *PLoS ONE*. 2013;8:e61126.
37. Dietrich C, Köhler T, Brune A, Kohler T, Brune A. The cockroach origin of the termite gut microbiota: Patterns in bacterial community structure reflect major evolutionary events. *Applied and Environmental Microbiology*. 2014;80:2261–9.

38. Mikaelyan A, Dietrich C, Köhler T, Poulsen M, Sillam-Dussès D, Brune A, et al. Diet is the primary determinant of bacterial community structure in the guts of higher termites. *Molecular Ecology*. 2015;24:5284–95.
39. Abdul Rahman N, Parks DH, Willner DL, Engelbrektson AL, Goffredi SK, Warnecke F, et al. A molecular survey of Australian and North American termite genera indicates that vertical inheritance is the primary force shaping termite gut microbiomes. *Microbiome*. 2015;3:5.
40. Rossmassler K, Dietrich C, Thompson C, Mikaelyan A, Nonoh JO, Scheffrahn RH, et al. Metagenomic analysis of the microbiota in the highly compartmented hindguts of six wood- or soil-feeding higher termites. *Microbiome*. 2015;3:56.
41. Tai V, James ER, Nalepa CA, Scheffrahn RH, Perlman SJ, Keeling PJ, et al. The role of host phylogeny varies in shaping microbial diversity in the hindguts of lower termites. *Applied and Environmental Microbiology*. 2015;81:1059–70.
42. Zhang X, Leadbetter JR. Evidence for cascades of perturbation and adaptation in the metabolic genes of higher termite gut symbionts. *mBio*. 2012;3:1–11.
43. Duarte S, Nobre T, Borges PAV, Nunes L. Symbiotic flagellate protists as cryptic drivers of adaptation and invasiveness of the subterranean termite *Reticulitermes grassei* Clément. *Ecology and Evolution*. 2018;8:5242–53.
44. Liu N, Li H, Chevrette MG, Zhang L, Cao L, Zhou H, et al. Functional metagenomics reveals abundant polysaccharide-degrading gene clusters and cellobiose utilization pathways within gut microbiota of a wood-feeding higher termite. *The ISME Journal*. 2019;13:104.



45. Abe T. Evolution of life types in termites. In: Kawano S, Connell JH, and Hidaka T, editor. Evolution and coadaptation in biotic communities. University of Tokyo Press; 1987. p. 125–46.
46. Korb J. Termites. *Current Biology*; 2007.
47. Lenz M. Food resources, colony growth and caste development in wood-feeding termites. In: Nalepa CA, Hunt J, editors. Nourishment and evolution in insect societies. Boulder, CO, USA: Westview Press; 1994. p. 159–209.
48. Korb J, Hoffmann K, Hartfelder K. Molting dynamics and juvenile hormone titer profiles in the nymphal stages of a lower termite, *Cryptotermes secundus* (Kalotermitidae)--signatures of developmental plasticity. *J Insect Physiol.* 2012;58:376–83.
49. Lainé LV, Lainé LV, Wright DJ. The life cycle of *Reticulitermes* spp (Isoptera: Rhinotermitidae): what do we know? *Bull Entomol Res.* 2003;93:267–378.
50. Douglas AE. Lessons from studying insect symbioses. *Cell Host Microbe.* 2011;10:359–67.
51. Ma D, Leulier F. The importance of being persistent: The first true resident gut symbiont in *Drosophila*. *PLOS Biology.* 2018;16:e2006945.
52. Hongoh Y, Deevong P, Inoue T, Moriya S, Trakulnaleamsai S, Ohkuma M, et al. Intra- and Interspecific Comparisons of Bacterial Diversity and Community Structure Support Coevolution of Gut Microbiota and Termite Host Intra- and Interspecific Comparisons of Bacterial Diversity and Community Structure Support Coevolution of Gut Micro. *Applied and environmental microbiology.* 2005;71:6590–9.

53. Hongoh Y, Ekpornprasit L, Inoue T, Moriya S, Trakulnaleamsai S, Ohkuma M, et al. Intracolony variation of bacterial gut microbiota among castes and ages in the fungus-growing termite *Macrotermes gilvus*. *Molecular Ecology*. 2006;15:505–16.
54. Benjamino J, Graf J. Characterization of the Core and Caste-Specific Microbiota in the Termite, *Reticulitermes flavipes*. *Frontiers in microbiology*. 2016;7:171.
55. Benjamino J, Lincoln S, Srivastava R, Graf J. Low-abundant bacteria drive compositional changes in the gut microbiota after dietary alteration. *Microbiome*. 2018;6. doi:10.1186/s40168-018-0469-5.
56. Bray JR, Curtis JT. An Ordination of the Upland Forest Communities of Southern Wisconsin. *Ecological Monographs*. 1957;27:326–49.
57. Segata N, Izard J, Waldron L, Gevers D, Miropolsky L, Garrett WS, et al. Metagenomic biomarker discovery and explanation. *Genome Biology*. 2011;12:R60.
58. Whittle G, Shoemaker NB, Salyers AA. The role of *Bacteroides* conjugative transposons in the dissemination of antibiotic resistance genes. *Cellular and Molecular Life Sciences (CMLS)*. 2002;59:2044–54.
59. Liu N, Zhang L, Zhou H, Zhang M, Yan X, Wang Q, et al. Metagenomic insights into metabolic capacities of the gut microbiota in a fungus-cultivating termite (*Odontotermes yunnanensis*). *PloS one*. 2013;8:e69184.
60. Lombard V, Golaconda Ramulu H, Drula E, Coutinho PM, Henrissat B. The carbohydrate-active enzymes database (CAZy) in 2013. *Nucleic Acids Res*. 2014;42 Database issue:D490-495.
61. Déjean G, Blanvillain-Baufumé S, Boulanger A, Darrasse A, Bernonville TD de, Girard A-L, et al. The xylan utilization system of the plant pathogen *Xanthomonas campestris* pv

*campestris* controls epiphytic life and reveals common features with oligotrophic bacteria and animal gut symbionts. *New Phytologist*. 2013;198:899–915.

62. Hottes AK, Meewan M, Yang D, Arana N, Romero P, McAdams HH, et al. Transcriptional Profiling of *Caulobacter crescentus* during Growth on Complex and Minimal Media. *J Bacteriol*. 2004;186:1448–61.

63. Burnum KE, Callister SJ, Nicora CD, Purvine SO, Hugenholtz P, Warnecke F, et al. Proteome insights into the symbiotic relationship between a captive colony of *Nasutitermes corniger* and its hindgut microbiome. *The ISME journal*. 2011;5:161–4.

64. Baum DA, Futuyma DJ, Hoekstra HE, Lenski RE, Moore AJ, Peichel CL, et al. *The Princeton Guide to Evolution*. Princeton University Press; 2013.

65. McMahan EA. Feeding relationships and radio-isotope techniques. In: *Biology of Termites*. Academic Press, New York, London; 1969. p. 387–406.

66. Blanvillain S, Meyer D, Boulanger A, Lautier M, Guynet C, Denancé N, et al. Plant Carbohydrate Scavenging through TonB-Dependent Receptors: A Feature Shared by Phytopathogenic and Aquatic Bacteria. *PLoS ONE*. 2007;2:e224.

67. Schauer K, Rodionov DA, de Reuse H. New substrates for TonB-dependent transport: do we only see the ‘tip of the iceberg’? *Trends in Biochemical Sciences*. 2008;33:330–8.

68. Koebnik R. TonB-dependent trans-envelope signalling: the exception or the rule? *Trends Microbiol*. 2005;13:343–7.

69. Martens EC, Lowe EC, Chiang H, Pudlo NA, Wu M, McNulty NP, et al. Recognition and degradation of plant cell wall polysaccharides by two human gut symbionts. *PLoS Biol*. 2011;9:e1001221.

70. Fengel D, Grosser D. Chemische Zusammensetzung von Nadel- und Laubhölzern. Holz als Roh-und Werkstoff. 1975;33:32–4.
71. Pettersen RC. The Chemical Composition of Wood. Adv Chem Ser. 1984;207.
72. Korb J, Lenz M. Reproductive decision-making in the termite, *Cryptotermes secundus* (Kalotermitidae), under variable food conditions. Behavioral Ecology. 2004;15:390–5.
73. Scheffrahn R. Cuban subterranean termite - *Reticulitermes simplex* (Hagen). 2007. [http://entnemdept.uft.edu/creatures/urban/termites/p\\_simplex.htm](http://entnemdept.uft.edu/creatures/urban/termites/p_simplex.htm). Accessed 12 Jul 2018.
74. Dedeine F, Dupont S, Guyot S, Matsuura K, Wang C, Habibpour B, et al. Historical biogeography of *Reticulitermes termites* (Isoptera: Rhinotermitidae) inferred from analyses of mitochondrial and nuclear loci. Molecular Phylogenetics and Evolution. 2016;94 Pt B:778–90.
75. Smythe RV, Carter FL. Feeding Responses to Sound Wood by the Eastern Subterranean Termite, *Reticulitermes flavipes*. Annals of the Entomological Society of America. 1969;62:335–7.
76. Cárdenas AM, Gallardo P, Toledo D. Suitability of multiple Mediterranean oak species as a food resource for *Reticulitermes grassei* Clément (Isoptera: Rhinotermitidae). Bull Entomol Res. 2018;108:532–9.
77. Janzow MP, Judd TM. The Termite *Reticulitermes flavipes* (Rhinotermitidae: Isoptera) Can Acquire Micronutrients from Soil. Environ Entomol. 2015;44:814–20.
78. Judd TM, Landes JR, Ohara H, Riley AW. A Geometric Analysis of the Regulation of Inorganic Nutrient Intake by the Subterranean Termite *Reticulitermes flavipes* Kollar. Insects. 2017;8:97.

79. Wertz JT, Breznak JA. *Stenoxybacter acetivorans* gen. nov., sp. nov., an Acetate-Oxidizing Obligate Microaerophile among Diverse O<sub>2</sub>-Consuming Bacteria from Termite Guts. *Appl Environ Microbiol.* 2007;73:6819–28.
80. Kuhnigk T, Branke J, Krekeler D, Cypionka H, König H. A Feasible Role of Sulfate-Reducing Bacteria in the Termite Gut. *Systematic and Applied Microbiology.* 1996;19:139–49.
81. Breznak JA. Biochemical aspects of symbiosis between termites and their intestinal microbiota. In: Anderson J, editor. *Invertebrate - Microbial Interaction.* Cambridge University Press, Cambridge; 1984. p. 173–203.
82. Li H, Yelle DJ, Li C, Yang M, Ke J, Zhang R, et al. Lignocellulose pretreatment in a fungus-cultivating termite. *Proc Natl Acad Sci USA.* 2017;114:4709–14.
83. Huang X-F, Bakker MG, Judd TM, Reardon KF, Vivanco JM. Variations in diversity and richness of gut bacterial communities of termites (*Reticulitermes flavipes*) fed with grassy and woody plant substrates. *Microbial ecology.* 2013;65:531–6.
84. Harrison MC, Jongepier E, Robertson HM, Arning N, Bitard-Feildel T, Chao H, et al. Hemimetabolous genomes reveal molecular basis of termite eusociality. *Nature Ecology & Evolution.* 2018;2:557.
85. Misof B, Liu S, Meusemann K, Peters RS, Donath A, Mayer C, et al. Phylogenomics resolves the timing and pattern of insect evolution. *Science.* 2014;346:763–7.
86. Bushnell B. BBMap. [sourceforge.net/projects/bbmap/](https://sourceforge.net/projects/bbmap/).
87. Huson DH, Auch AF, Qi J, Schuster SC. MEGAN analysis of metagenomic data. *Genome Res.* 2007;17:377–86.

88. Suzuki R, Shimodaira H. Pvcust: An R package for assessing the uncertainty in hierarchical clustering. *Bioinformatics*. 2006;22:1540–2.
89. Oksanen J, Blanchet FG, Friendly M, Kindt R, Legendre P, Mcglinn D, et al. *vegan: Community Ecology Package*. Ordination methods, diversity analysis and other functions for community and vegetation ecologists. Version 2.4-3. URL <https://CRAN.R-project.org/package=vegan>. 2017.
90. Asnicar F, Weingart G, Tickle TL, Huttenhower C, Segata N. Compact graphical representation of phylogenetic data and metadata with GraPhlAn. *PeerJ*. 2015;3:e1029.
91. Buchfink B, Xie C, Huson DH. Fast and sensitive protein alignment using DIAMOND. *Nature Methods*. 2015;12:59–60.
92. Shallom D, Shoham Y. Microbial hemicellulases. *Curr Opin Microbiol*. 2003;6:219–28.
